# Supplementary material
Source: PubMed Central journal article supplement (PMC7568247)
Supplement: pnas.2006716117.sapp.pdf [file pnas.2006716117.sapp.pdf]

## Supplementary Information for

### “High concentration of ultrafine particles in the Amazon free troposphere produced by organic new particle formation”

#### This PDF file includes:

Sections 1 to 8

Figures S1 to S16

Table S1 to S3

#### 1. Description of the radical 2D-VBS framework and determination of its parameterization

In the radical 2D-VBS framework (1), organic species are lumped into the C\* and O:C space with C\* ranging from  $10^{-10}$  to  $10^6 \mu\text{g m}^{-3}$ , separated by powers of 10 (i.e., 17 bins in total), and O:C ranging from 0 to 1.3, separated by 0.1 (i.e., 14 bins in total). The reactions begin with oxidation of monoterpene with  $\text{O}_3$ , OH, and  $\text{NO}_3$ , producing peroxy radicals ( $\text{RO}_2$ ). The peroxy radicals will undergo two types of reactions: autoxidation or radical termination. Autoxidation generates a more oxidized peroxy radical that will undergo further autoxidation or termination. Since only some peroxy radicals may have rapid autoxidation pathways, we distinguish in the model two types of peroxy radicals: one has the potential for autoxidation and the other does not. The radical termination proceeds via unimolecular termination or reactions with  $\text{HO}_2$ , NO, or another peroxy radical. The peroxy radical cross-reactions can produce dimers ( $\text{ROOR}$ ), the fraction of which in all cross-reaction products is assumed to depend on the volatility of the two reacting peroxy radicals. The non-dimer cross-reaction products as well as the termination products via unimolecular termination or reaction with NO will undergo either functionalization or fragmentation with a branching ratio ( $br$ , defined as the fraction of fragmentation among the

25 two competing pathways). We map the stable molecules generated from each peroxy radical  
26 termination pathway to a distribution of species in the 2D-VBS space through kernels, which allow  
27 us to represent the wide variety of both the peroxy radicals and the stabilization reactions (1).  
28 Kernels, which were first described for the 2D-VBS in Donahue et al. (2) (e.g. Fig. S1), define the  
29 rule to map a reactant of any given volatility and O:C (termination products of peroxy radical in  
30 the case of the radical 2D-VBS) to a distribution of reaction products in the 2D-VBS framework.  
31 They are established based on experimental data and a-priori consideration of organic oxidation  
32 methods as well as functional-group contributions to volatility. The kernels used in this work are  
33 summarized in Table S3–S6 of Schervish and Donahue (1).

34 We simulate a series of laboratory experiments with the radical 2D-VBS, compare modeled  
35 HOM yields and SOA concentrations with measurements, and optimize key 2D-VBS parameters  
36 to achieve a good model-measurement agreement. Before going into details, we would like to  
37 mention that, purely in terms of the number of parameters, the radical 2D-VBS is more tunable  
38 than many other modeling approaches (though it is an enormous simplification of actual organic  
39 oxidation mechanisms). This is why the long-standing methodology associated with the VBS has  
40 been to employ a disciplined approach, reducing the degrees of freedom via the oxidation kernels  
41 described above. Because of this, the effective number of degrees of freedom is reduced to a  
42 handful of branching ratios between different termination reactions. This approach substantially  
43 reduces the tuneability but still reasonably represents the variety of both the peroxy radicals and  
44 the stabilization reactions. For example, in the simulations of laboratory experiments we only  
45 perturb three key parameters within a theoretically reasonable a-priori range while keeping other  
46 parameters (e.g., reaction rate coefficients) at the default values derived from kinetic literature (1).  
47 The three key parameters are: the fraction of first-generation peroxy radicals that can potentially

48 autoxidize in all those formed via 1) the  $\alpha$ -pinene + O<sub>3</sub> reaction ( $f_{O_3}$ ) and 2) the  $\alpha$ -pinene + OH  
49 reaction ( $f_{OH}$ ), and finally, 3) *br*. Among all 2D-VBS parameters, these three parameters are  
50 comparatively uncertain and significantly influence simulated HOM and SOA concentrations;  
51 therefore, we opt to optimize their values through simulation and evaluation against laboratory  
52 experiments. This in reality is hardly, if at all, more tunable than a scheme that arbitrarily selects  
53 a fraction of oxidation products from a few precursors to condense to or nucleate particles (a  
54 common approach in global models).

### 55 1.1 Simulation of HOM yields and comparison with experimental data

56 We simulate a number of laboratory experiments, which measured the yields of HOMs from  
57  $\alpha$ -pinene + O<sub>3</sub> (3-6) and  $\alpha$ -pinene + OH (3-5, 7). Table S2 and S3 summarize the experimental  
58 conditions for these experiments and the corresponding conditions we use in the 2D-VBS  
59 simulations. The O<sub>3</sub> concentrations used in these experiments (12–86 ppb) are similar to  
60 observations in the pristine conditions of the Amazon boundary layer (8–17 ppb) (8-10). The OH  
61 and  $\alpha$ -pinene concentrations in the experiments cover a wide range, i.e., from  $4 \times 10^4$  to  $4 \times 10^8$   
62 mole cm<sup>-3</sup> for OH and from ~0.05 to 160 ppb for  $\alpha$ -pinene. These concentration ranges include  
63 observed concentrations in relatively pristine conditions of the Amazon boundary layer, i.e., 2–  
64  $5 \times 10^5$  mole cm<sup>-3</sup> for OH (11) and 0.14–0.9 ppb for monoterpenes (12-14). In the 2D-VBS  
65 simulations, we tried to exactly reproduce the experimental conditions whenever possible. Some  
66 studies (e.g., Sarnela et al. (6)) performed only a handful of experiments and listed the conditions  
67 for all experiments, thus we simulated each and every experiment based on the exact conditions.  
68 Other studies (3-5, 7), however, conducted a large number of experiments without providing the  
69 conditions or HOM yields of each individual experiment; in this case, we conducted several typical

70 model runs with  $\alpha$ -pinene and/or oxidant concentrations representing relatively high and low  
71 levels within the experimental range (see Table S2 and S3).

72 As mentioned above, we adjust the values of  $f_{O_3}$ ,  $f_{OH}$ , and  $br$  in our simulations and keep  
73 the other parameters at their default values (1). Note that  $f_{O_3}$  and  $f_{OH}$  represent the fractions of  
74 *first-generation* peroxy radicals that can potentially autoxidize. These “autoxidizable” peroxy  
75 radicals are allowed to undergo up to three generations of autoxidation in the model. The fraction  
76 of peroxy radicals actually autoxidized differs between simulations, depending on the relative rates  
77 of autoxidation and bimolecular reactions.

78 For a fair comparison between simulated and measured HOM yields, we adopt a widely  
79 accepted HOM definition, where HOMs are organic compounds containing at least six oxygen  
80 atoms formed through autoxidation and subsequent termination processes (15). In the 2D-VBS  
81 context, autoxidized monomers with O:C  $\geq$  0.6 and autoxidized dimers with O:C  $\geq$  0.3 are regarded  
82 as HOMs. Figures S9 and S10 compare 2D-VBS simulated HOM molar yields with measurements  
83 from laboratory experiments involving  $\alpha$ -pinene + O<sub>3</sub> and  $\alpha$ -pinene + OH reactions, respectively.  
84 While all three parameters perturbed affect HOM molar yields,  $f_{O_3}$  and  $f_{OH}$  are found to have the  
85 largest impact on HOM yields from  $\alpha$ -pinene + O<sub>3</sub> and  $\alpha$ -pinene + OH, respectively. Therefore,  
86 Figures S9 and S10 only show the simulation results when perturbing the most sensitive parameter,  
87 with the other two parameters set to the final values used in our 3-D simulations. To determine the  
88 optimal parameters, we estimate the mean bias ( $MB$ ) of HOM yield:

$$MB = \frac{1}{N} \sum_{n=1}^N \left( \frac{1}{M(n)} \sum_{m=1}^{M(n)} (Y_{m,n}^{sim} - Y_{m,n}^{expt}) \right)$$

89 where  $Y_{m,n}^{sim}$  is the simulated HOM yield in the  $m^{\text{th}}$  run for the  $n^{\text{th}}$  experimental study and  $Y_{m,n}^{expt}$  is  
90 the corresponding measured value;  $M(n)$  is the number of runs for the  $n^{\text{th}}$  study;  $N$  is the number  
91 of studies considered in this work (as summarized in Table S2 and S3).

92 Figure S9 shows that the simulated HOM yield from  $\alpha$ -pinene +  $O_3$  increases roughly  
93 linearly with  $f_{O_3}$ . The minimum  $MB$  is achieved at  $f_{O_3} = 0.25$ , which gives a  $MB = -0.0012$ . At  
94 this  $f_{O_3}$ , the 2D-VBS simulated HOM yields agree fairly well with experimental data in almost all  
95 studies. Similarly, for HOM yield from  $\alpha$ -pinene + OH,  $f_{OH} = 0.10$  gives a minimum  $MB$  of  
96  $-2.1 \times 10^{-5}$  (Fig. S10). Compared with the  $\alpha$ -pinene +  $O_3$  reaction, however, the measured HOM  
97 yields from  $\alpha$ -pinene + OH reaction show a relatively large variability, partly because OH-initiated  
98 HOMs are highly sensitive to the choice of detection technique (7). Hence, the 2D-VBS with the  
99 optimal  $f_{OH}$  overestimates the HOM yield from Jokinen et al. (5) while underestimating that from  
100 Berndt et al. (7).

## 101 1.2 Simulation of SOA concentrations and comparison with experimental data

102 In addition to HOMs, we also simulate a number of laboratory experiments that measured  
103 SOA production from  $\alpha$ -pinene. These experiments involve reactions of  $\alpha$ -pinene with  $O_3$  (16, 17)  
104 and OH (18), under both high- $NO_x$  (17, 18) and low- $NO_x$  (16-18) conditions. We use different  
105 experiments to constrain HOM and SOA simulation results because previous studies seldom  
106 reported HOM and SOA yields simultaneously. To better represent the atmospheric conditions  
107 over the Amazon, we select experiments with relatively low aerosol mass concentrations. The  
108 experimental conditions (which are also the conditions for 2D-VBS simulations) have been  
109 summarized in Table 1 of Shilling et al. (16), Table 1 of Presto et al. (17), and Table 2 of Ng et al.  
110 (18). The measured and simulated SOA concentrations for all experiments are illustrated in Fig.  
111 S11. These experiments span an SOA concentration range of  $\sim 0.1$  to  $200 \mu\text{g m}^{-3}$ . Observational

112 studies (9, 14, 19) in the Amazon boundary layer showed OA concentrations of  $1.0\text{--}9.0 \mu\text{g m}^{-3}$   
 113 averaged across various conditions in the wet and dry seasons and  $0.2\text{--}0.6 \mu\text{g m}^{-3}$  under relatively  
 114 pristine conditions; in the upper troposphere, Andreae et al. (19) reported an OA concentration of  
 115  $1.6 \mu\text{g m}^{-3}$  (normalized to standard temperature and pressure, STP) in the dry season. Therefore,  
 116 the OA concentration range in the experiments covers ambient concentrations over the Amazon.  
 117 As with the HOM yields, we adjust  $f_{O_3}$ ,  $f_{OH}$ , and  $br$  in the simulations, but only show in Fig. S11  
 118 the simulation results when  $br$  is adjusted while the other two parameters are held fixed at the final  
 119 values used in our 3-D simulations, since the simulated SOA concentration is most sensitive to  $br$ .  
 120 Given the large range of SOA concentrations, we use the mean normalized bias (*MNB*) of SOA  
 121 concentrations (cf. *MB* for HOM yields) to determine the optimal parameters.

$$122 \quad MNB = \frac{1}{N} \sum_{n=1}^N \left( \frac{1}{M(n)} \sum_{m=1}^{M(n)} (SOA_{m,n}^{sim} - SOA_{m,n}^{expt}) / SOA_{m,n}^{expt} \right)$$

123 where  $SOA_{m,n}^{sim}$  is the simulated SOA concentration in the  $m^{\text{th}}$  run for the  $n^{\text{th}}$  experimental study  
 124 and  $SOA_{m,n}^{expt}$  is the corresponding measured value;  $M(n)$  is the number of runs for the  $n^{\text{th}}$  study;  
 125  $N$  is the number of studies considered in this work.

126 Figure S11 shows that the simulated SOA concentrations decrease when  $br$  increases from  
 127 (a) to (f). The minimum *MNB* is achieved at  $br = (O:C)^{1/2}$ , which gives a *MNB* = 0.7%. At this  
 128  $br$ , the 2D-VBS simulated SOA concentrations agree reasonably well with experimental data in  
 129 most studies.

130 To examine the influence on our atmospheric simulations of the parameter optimization to  
 131 fit SOA experiments, we conducted a sensitivity analysis using the default 2D-VBS parameters in  
 132 Schervish and Donahue (1), where fragmentation is not assumed to occur (i.e., functionalization  
 133 is 100%). The results are illustrated in Fig. S16. Compared with the case without fragmentation,

134 the base case used in this study predicts lower OA concentrations and is closer to observations  
135 most of the time except for a few brief periods (e.g., 14:31–14:38 UTC). Nevertheless, the  
136 difference between these two cases is not large because the change of parameters only affects  
137 monoterpene SOA, while the SOA derived from other precursors are simulated with a 1D-VBS  
138 (20) in both cases. The present study focuses on the simulation of NPF. Because of this we only  
139 optimize the 2D-VBS parameters for monoterpenes, which are linked to NPF in the model. If we  
140 optimized the parameters for other precursors against laboratory experiments as well, we would  
141 expect a larger difference between the simulation results using optimized and default parameters.

### 142 1.3 Temperature dependence of HOM yields

143 Compared with the above evaluations near room temperature (278–298 K), it is more  
144 challenging to evaluate simulated temperature dependence of HOM yields. While it has been well  
145 recognized that the autoxidation rate and hence the HOM yield is strongly temperature dependent,  
146 there are some challenges in accurately measuring the HOM yield at low temperature, partly  
147 because the condensation loss of HOMs as well as the losses to chamber wall or sampling lines  
148 are much enhanced due to substantially reduced volatility at low temperature. Stolzenburg et al.  
149 (21) measured the yields and gas-phase spectra of HOMs from  $\alpha$ -pinene + O<sub>3</sub> at 298 K, 278 K,  
150 and 248 K in the CLOUD (Cosmics Leaving Outdoor Droplets) chamber, and found that the  
151 calculated particle growth rates and composition based on these HOM vapor measurements are  
152 consistent with both measured growth rates and particle-phase composition. Therefore, we  
153 consider their measurements to be the most robustly constrained values available regarding the  
154 temperature dependence of HOM yields. The results showed that the HOM yield decreases by a  
155 factor of ~20 when temperature decreases from 298 K to 248 K. Our 2D-VBS simulations at their  
156 experimental conditions (0.6 ppb  $\alpha$ -pinene, 40 ppb O<sub>3</sub>, dark) show that the HOM yield decreases

157 by a factor of 25 from 298 K to 248 K, quite similar to the results of Stolzenburg et al. (21). A  
158 more systematic evaluation of the temperature-dependence of HOM yield will be warranted when  
159 more well-constrained experimental data become available.

#### 160 1.4 Consideration about high-NO<sub>x</sub> vs. low-NO<sub>x</sub> conditions

161 While the HOM yield measurements employed in this study were mostly conducted under  
162 low-NO<sub>x</sub> conditions (such measurements have rarely been conducted under high-NO<sub>x</sub> conditions),  
163 the SOA concentration measurements cover both high-NO<sub>x</sub> and low-NO<sub>x</sub> conditions. We include  
164 experiments spanning a wide range of environmental conditions to enable a broad applicability of  
165 our model. Our model considers some of the NO<sub>x</sub> dependency by explicitly treating the  
166 competition between different reaction pathways of peroxy radicals (e.g., RO<sub>2</sub> + NO vs.  
167 autoxidation, RO<sub>2</sub> + HO<sub>2</sub>, and RO<sub>2</sub> + RO<sub>2</sub>). However, we did not consider the NO<sub>x</sub> dependency of  
168 the subsequent stabilization reactions of peroxy radical termination products because that is not  
169 the focus of this study. Figure S11d shows that, with the optimal parameters, the simulated SOA  
170 concentrations agree fairly well with measurements under both high-NO<sub>x</sub> and low-NO<sub>x</sub> conditions,  
171 though some discrepancies exist. Nevertheless, considering that this study focuses on the pristine  
172 areas of the Amazon where the low-NO<sub>x</sub> conditions prevail, we also conduct a sensitivity  
173 simulation in which the 2D-VBS parameters are determined only based on evaluation against low-  
174 NO<sub>x</sub> experiments. In this case, the branching ratio that agrees best with experimental data is  $br =$   
175  $0.9 \times (O:C)$  ( $f_{O_3}$  and  $f_{OH}$  are unchanged). Figure S15 compares simulated OA concentrations in  
176 the base case and the sensitivity case (“low-NO<sub>x</sub> only”) with G-1 observations on March 7. This  
177 parameter change from our base case has only a slight effect on the simulated OA concentrations,  
178 because 1) the adjusted parameters are not too far from the original ones, and 2) they only affect



179 SOA formed from monoterpenes. The effect on NPF is also small given the relatively small  
180 influence of *br* on HOM yield.

## 181 **2. Configuration of the updated WRF-Chem model for application to the Amazon**

182 We apply our updated WRF-Chem model to a domain covering the central Amazon basin  
183 with a grid spacing of 10 km (Fig. 1). The vertical resolution includes 45 layers from the surface  
184 to 50 hPa with more closely spaced layers at lower altitudes. The gas chemistry and equilibrium  
185 gas-particle partitioning of monoterpene and its oxidation products are modeled using the radical  
186 2D-VBS. Other gas and aerosol chemistry is simulated using the SAPRC99 gas chemistry scheme  
187 (22) coupled with the MOSAIC (Model for Simulating Aerosol Interaction and Chemistry) aerosol  
188 module (23) and a one-dimensional VBS (20) for SOA modeling. The aqueous-phase chemistry  
189 is based on the Carnegie Mellon University (CMU) scheme of Fahey and Pandis (24).

190 The meteorological initial and boundary conditions are generated from the National Centers  
191 for Environmental Prediction (NCEP) Climate Forecast System Version 2 reanalysis data (CFSv2)  
192 at a  $0.5^\circ \times 0.5^\circ$  and 6-h resolution. The chemical initial and boundary conditions are provided by a  
193 quasi-global WRF-Chem simulation in 2014 (25, 26). A 5-day spin-up period is used to minimize  
194 the influence of initial conditions on simulation results. The version of WRF-Chem used for the  
195 quasi-global simulations employed the same treatment of aerosol transport, dry deposition, and  
196 wet removal as our modified version. However, the quasi-global version used 8 aerosol size bins  
197 (cf. 20 bins in our modified version) and did not consider the formation of ultra- and extremely  
198 low volatility organic compounds (ULVOC and ELVOC) nor their contributions to NPF. Note that  
199 almost all ULVOC and ELVOC are produced locally and instantaneously, rather than transported  
200 from elsewhere or accumulated over time, because they have a very short gas-phase lifetime in the  
201 atmosphere due to their extremely low volatilities and consequent condensational loss.

202 Nevertheless, the simplified treatment in the quasi-global simulation may to some extent  
203 underestimate the loading of pre-existing aerosols advected into the simulation domain, which may  
204 subsequently affect the condensation sink of ULVOC/ELVOC that drive organic NPF. To examine  
205 the potential effect of the boundary conditions, we divide the simulation domain into 9 (3×3) equal  
206 blocks. Since the prevailing winds were northeasterly during both the wet-season and dry-season  
207 simulation periods, aerosols were predominantly transported from northeast to southwest.  
208 Therefore, we can use the lower left block of the domain to test potential sensitivity to boundary  
209 conditions. The other 8 blocks, in which the aerosol fields are simulated by our modified version  
210 of WRF-Chem, effectively constitute the outer domain for this block. In this lower-left block, we  
211 find that, during the wet-season and dry-season periods, ultrafine particles < 50 nm account for  
212 90% and 73% of the total aerosol surface area in the upper troposphere above 13 km, respectively.  
213 These ultrafine particles are predominantly produced by local NPF and not transported from other  
214 regions (the other 8 blocks in this case), because transported aerosols have usually grown to larger  
215 sizes. In other words, the upper-tropospheric aerosol surface area is likely dominated by locally  
216 formed ultrafine particles. For this reason, we conclude that the simplified aerosol treatment in the  
217 quasi-global simulations should only moderately affect the pre-existing aerosol surface area and  
218 NPF rates in the simulation domain, and so should not affect the major conclusions of this study.

219 The physical options used include the Community Land Model Version 4 (CLM4) (27), the  
220 Yonsei University (YSU) PBL scheme (28), the Grell-Freitas cumulus scheme (29), the Morrison  
221 double-moment scheme for cloud microphysics (30), and the Rapid and accurate Radiative  
222 Transfer Model for GCM (RRTMG) shortwave and longwave radiation scheme (31). For aerosol-  
223 cloud interactions, aerosols are activated based on the parameterization of Abdul-Razzak and Ghan  
224 (32), which is subsequently coupled with the Morrison cloud microphysics scheme. The grid-scale

225 wet removal of chemical species is simulated based on Easter et al. (33). The approach to simulate  
226 subgrid convective transport and wet removal of chemical species was developed by Grell and  
227 Devenyi (34) and described in more details by Grell and Freitas (29). Both the grid-scale and  
228 subgrid schemes treat the wet removal of aerosols and some inorganic gases (such as SO<sub>2</sub>, H<sub>2</sub>O<sub>2</sub>,  
229 CH<sub>3</sub>O<sub>2</sub>H, O<sub>3</sub>, H<sub>2</sub>SO<sub>4</sub>, and methanesulfonic acid) without considering the wet removal of organic  
230 gases. Theoretically, deep convective clouds that transport precursors of ULVOC and ELVOC to  
231 the upper troposphere are efficient removers of soluble species. Nevertheless, primary biogenic  
232 volatile organic compounds (VOCs) and their less oxidized reaction products usually have low  
233 solubility and are thus not susceptible to wet removal. Highly oxidized reaction products are more  
234 soluble, but they will be rapidly removed by condensation due to their low volatilities even without  
235 considering wet removal. In fact, as we mentioned above, almost all upper-tropospheric ULVOC  
236 and ELVOC are produced locally rather than transported from the lower troposphere in our model.  
237 Therefore, neglecting wet removal of organic gases should have limited impact on simulated  
238 ULVOC and ELVOC concentrations in the upper troposphere. Even so, an improved treatment of  
239 wet removal of organic gases with a sophisticated parameterization of solubility will enable a more  
240 accurate simulation of upper-tropospheric ULVOC and ELVOC concentrations, which warrants  
241 future model development and further studies.

242 We employ the Amazon anthropogenic emission inventory used by Shrivastava et al. (10),  
243 which combines several emission inventories from different sources to obtain reasonable estimates  
244 of trace gases and aerosol emissions. The biogenic emissions are calculated online using the Model  
245 of Emissions of Gases and Aerosols from Nature (MEGAN v2.1) (35) that has been recently  
246 coupled within the land surface scheme CLM4 in WRF-Chem (36). The wildfire emissions are  
247 obtained from the Fire INventory from NCAR (FINN), a widely used fire emission product in the

248 research community (37). The size distribution of primary particle emissions is assumed to observe  
249 lognormal distributions following the assumption of the default WRF-Chem (38). Since this study  
250 focuses on relatively pristine areas, especially the high altitudes where NPF dominates the particle  
251 concentration (*SI Appendix*, Fig. S2), the primary particle emissions have minimal effect on our  
252 simulation results.

### 253 **3. Sources of observational data**

254 We use a series of in-situ measurements over the Amazon basin to evaluate our model and  
255 support our main findings. Most measurements were achieved during the GoAmazon  
256 (Observations and Modelling of the Green Ocean Amazon) campaign (14, 39, 40) in both the wet  
257 and dry seasons of 2014 and the ACRIDICON-CHUVA (Aerosol, Cloud, Precipitation, and  
258 Radiation Interactions and Dynamics of Convective Cloud Systems – Cloud Processes of the Main  
259 Precipitation Systems in Brazil: A Contribution to Cloud Resolving Modeling and to the GPM)  
260 campaign (19, 41) in the dry season of 2014. Main pollution sources during the campaigns include  
261 anthropogenic emissions of Manaus (an isolated city of about two million people, see Fig. 1) from  
262 which the pollution plume generally follows the easterly or north-easterly trade winds during both  
263 seasons, and biomass burning emissions mainly in the southern part of the Amazon basin during  
264 the dry season. Our analysis focuses on measurements under relatively clean conditions to avoid  
265 the impact of these pollution sources. The G-1 aircraft was deployed during the GoAmazon  
266 campaign and was equipped with instruments for characterizing aerosol particles and trace gases.  
267 We use total aerosol number concentrations measured by a condensation particle counter (CPC,  
268 TSI model 3025, cutoff diameter 3 nm) and aerosol size distribution ranging from 10 nm to 400 nm  
269 in diameter characterized by a fast integrated mobility spectrometer (FIMS) at a time resolution of  
270 1 Hz (40). Since the G-1 aircraft rarely flew for a sufficient time at different altitudes under pristine

271 conditions (its mission was mainly to sample the urban plumes downwind of Manaus) and it cannot  
272 fly above 6 km altitude, we also use total aerosol number concentration measurements from the  
273 HALO aircraft deployed in the ACRIDICON–CHUVA campaign. The measurements were done  
274 by a CPC (modified Grimm CPC 5.410 by Grimm Aerosol Technik) with a nominal cutoff  
275 diameter of 4 nm (19). However, due to inlet losses, the effective cutoff diameter increased to  
276 about 10 nm near the surface and about 20 nm at 150 hPa (about 13.8 km) (19). In addition, we  
277 employ continuous measurements of aerosol size distribution (from 10 nm to 430 nm in particle  
278 diameter) characterized by a scanning mobility particle sizer (SMPS, TSI model 3080) at the T0a  
279 (ATTO) site (9, 40), which is located to the upwind direction of Manaus and is thus under relatively  
280 pristine conditions during most of the simulation period (see Fig. 1). The measurements at T0a  
281 were made during the GoAmazon campaign and covered the entire simulation periods of this  
282 study.

283       Apart from aerosol number and size distribution measurements, we also compared our  
284 simulation results with observations of organic aerosol and sulfate mass concentrations, which  
285 have established connections to organic and inorganic NPF. The measurements were made with  
286 an Aerodyne High-Resolution Time-of-Flight Aerosol Mass Spectrometer (HR-ToF-AMS)  
287 onboard the G-1 aircraft during GoAmazon (14). We also evaluate the model against monoterpene  
288 concentrations measured by an Ionicon quadrupole high-sensitivity Proton-Transfer-Reaction  
289 Mass Spectrometer (PTR-MS) onboard G-1 (14).

#### 290 **4. Supplementary evaluation results of the model**

291       In the main text, we have compared simulated aerosol number concentrations and size  
292 distributions at different heights with aircraft observations and showed a generally good agreement  
293 between our best-case scenario (“inorg+org\_2D-VBS”) and observational data. *SI Appendix,*

294 Fig. S12a illustrates the full time series of aerosol number concentration on March 7 from both G-  
295 1 measurements and model simulations. Consistent with Fig. 4a and Fig. 5, the results indicate that  
296 “nonuc” substantially underestimates observed aerosol number concentration at high altitudes  
297 while “inorg+org\_2D-VBS” gets the magnitude of number concentration correct. Nevertheless,  
298 there are some discrepancies between the model results and observations in terms of the fluctuation  
299 of concentrations over time, indicating that the exact location and timing of NPF are more difficult  
300 to simulate probably because they depend on the complex interplay between chemistry and  
301 meteorology over very fine spatiotemporal scales.

302 *SI Appendix*, Fig. S12b,c further compares modeled time series of *organic aerosol (OA)* and  
303 *sulfate* mass concentrations with observations by a HR-ToF-AMS (see *SI Appendix*, Section 3).  
304 Considering that organics and H<sub>2</sub>SO<sub>4</sub> are two major nucleating agents, the evaluation of OA and  
305 sulfate mass concentrations helps to check the reliability of the model results. The simulations  
306 generally agree with both the magnitude and variations of HR-ToF-AMS observations. For OA,  
307 observations show relatively high concentrations at low (< 3000 m) and high (> 5000 m) altitudes  
308 and relatively low concentrations at intermediate altitudes (3000–5000 m), which is reproduced  
309 by the model. For sulfate, both simulations and observations exhibit an obviously decreasing trend  
310 with increasing altitude, though the model slightly overestimates the sulfate concentrations near  
311 the surface.

312 We also evaluate simulated concentrations of *monoterpenes*, the precursors of ULVOC and  
313 ELVOC that drive organic NPF, against G-1 measurements (*SI Appendix*, Section 3) in the  
314 simulation periods during both wet and dry seasons. We find that the average simulated  
315 concentrations of 0.135 ppb and 0.125 ppb in the wet and dry seasons agree reasonably well with  
316 the corresponding observed values of 0.126 ppb and 0.104 ppb.

317 We then compare modelled aerosol number size distribution with surface observations that  
318 are available for a longer time period than aircraft measurements. We use observations at the T0a  
319 site, which is located to the upwind direction of Manaus and is thus under relatively pristine  
320 conditions during most of the simulation periods (see Fig. 1 for the site location and *SI Appendix*,  
321 Section 3 for a description of the observations). *SI Appendix*, Fig. S13a and b show the simulated  
322 and observed size distribution in the wet season and dry season, respectively. The model results  
323 agree with observations except for an underestimation of small particles, consistent with the  
324 evaluation results against G-1 measurements at the lowest altitude of 650 m on March 7 (Fig. 5a),  
325 probably because the rapid downward transport by convective downdrafts is not resolved by the  
326 10 km grid spacing.

327 To investigate whether a higher model resolution could help to minimize the underestimation  
328 of small particles at low altitudes, we conducted a sensitivity simulation for March 7 using a finer  
329 grid spacing of 4 km. The modelled size distribution at 650 m is illustrated in *SI Appendix*,  
330 Fig. S14. No noticeable improvement is found in the 4 km simulation, implying that a higher  
331 resolution and even large eddy simulation (LES) might be needed to fully capture convective  
332 downdrafts, which warrants further in-depth studies.

## 333 **5. Sensitivity analysis**

334 Considering the uncertainty in organic-mediated NPF, we examine the impact of some key  
335 factors on simulated aerosol concentration and NPF mechanisms through sensitivity analysis. First,  
336 autoxidation is the most important formation mechanism of ULVOC and ELVOC and its rate is a  
337 strong function of temperature:

$$338 \quad k = A \exp(-\theta_a/T)$$

339 where  $A$  is a pre-exponential factor,  $T$  is temperature, and  $\theta_a$  is the energy barrier height,  
340 which governs the temperature dependence of the reaction rate. We use  $\theta_a = 7500K$  in our base-  
341 case 2D-VBS. Praske et al. (42) summarized a number of studies and reported an uncertainty of  
342 352 K in the barrier height. We design two sensitivity experiments (“high-barrier” and “low-  
343 barrier”) by fixing the autoxidation rate at 298 K and varying the barrier height by  $\pm 500$  K (+500 K  
344 for “high-barrier” and  $-500$  K for “low-barrier”) in a Clausius-Clapeyron-like expression. We fix  
345 the rate constant at 298 K because at that temperature we constrained the HOM yields against  
346 laboratory experiments and thus have more confidence in the reaction rate. Second, we use  
347 ULVOC/ELVOC with O:C > 0.4 to drive organic-mediated NPF in the base-case simulation.  
348 While the threshold of 0.4 has certain theoretical basis and indirect experimental support, it has  
349 not been rigorously established. Hence, we design another experiment (“O:C-all”) in which we  
350 assume that ULVOC and ELVOC with all O:C values contribute to NPF. Finally, the strength of  
351 the temperature dependence of organic NPF rates is uncertain. In the base-case simulation, we  
352 apply a temperature dependence function which results in about a factor of 2.15 increase in NPF  
353 rate per 10 K of temperature decrease. To account for its uncertainty, we perform an sensitivity  
354 experiment with a stronger temperature dependence (“strong-T-dependence”) in which we apply  
355 the function of Dunne et al. (43), i.e.,  $J_T = J_{278K} \exp(-(T - 278)/10)$ . Meanwhile, we conduct  
356 another experiment (“weak-T-dependence”) which adopts a much weaker temperature dependence  
357 function of  $J_T = J_{278K} \exp(-(T - 278)/20)$ , which translates into a factor of 1.6 increase in NPF  
358 rate per 10 K of temperature decrease. The results of these sensitivity analyses are summarized in  
359 *SI Appendix*, Figs. S4 and S5.

## 360 **6. Vertical transport and its impact on aerosol concentrations**



361 At a given altitude, aerosols originate not only from in-situ NPF, but also from vertical  
362 transport. *SI Appendix*, Fig. S6a,b illustrates the net vertical aerosol fluxes as a function of height  
363 over the relatively pristine area defined in the main text (red dashed rectangle in Fig. 1), simulated  
364 by our best-case scenario (“inorg+org\_2D-VBS”). Particles smaller than 40 nm exhibit net  
365 downward fluxes at nearly all heights, indicating a continuous downward transport of small  
366 particles formed at high altitudes throughout the troposphere. Larger particles, however, show  
367 fluxes of different signs at different altitudes, suggesting that both the subsidence and growth of  
368 small new particles and the upward transport of boundary layer aerosols play significant roles. *SI*  
369 *Appendix*, Fig. S6c-f further examine statistically the impact of vertical transport on aerosol  
370 number concentrations at two representative vertical levels: 380 hPa (7.8 km), which is roughly  
371 the bottom of the upper troposphere, and 800 hPa (1.9 km), which is roughly the bottom of the  
372 free troposphere (top of boundary layer). As the vertical velocity changes from negative  
373 (descending) to positive (ascending) values, the particle number smaller than 40 nm decreases  
374 remarkably at both heights in both seasons, and the trends are all statistically significant at the 0.01  
375 level based on Student’s t-test, indicating that the downward transport effectively increases the  
376 concentrations of small particles at both heights. In contrast, particle number larger than 100 nm  
377 does not show an obvious trend with vertical velocity. As a combined effect, the total particle  
378 number concentration generally decreases when the vertical velocity changes from negative to  
379 positive, especially at 380 hPa, where small particles dominate the total particle number. We  
380 conclude from this analysis that the constant downward transport of an enormous number of newly  
381 formed particles in the upper troposphere acts as an important source of aerosol number  
382 concentrations across a wide range of altitudes, ranging from the lower part of the upper  
383 troposphere to the bottom of the free troposphere, under relatively pristine conditions. This extends

384 the findings of previous studies, which focused on how downward transport helps to sustain the  
385 aerosol number concentration at lower altitudes (primarily the boundary layer) of the tropics (40,  
386 44).

## 387 **7. Discussion of NPF mechanisms in tropical marine upper troposphere**

388 While organic-mediated NPF has been shown to dominate in the Amazon upper troposphere,  
389 it remains uncertain whether similar mechanisms also play an important role in the tropical marine  
390 upper troposphere, where monoterpene concentrations are much lower. Correspondingly, some  
391 studies suggested that NPF in the marine tropical upper troposphere is mainly driven by sulfuric  
392 acid (45, 46). However, Williamson et al. (44) (Extended Data Fig. 7) showed that, in the upper  
393 troposphere of the tropical Atlantic, the sulfate mass concentration is very low but the organic  
394 mass concentration is elevated compared with middle altitudes. In that instance, organics probably  
395 dominate the composition of smaller particles, as indicated by the large difference between the  
396 organic concentrations obtained by AMS (measuring particles of 50–500 nm) and PALMS  
397 (particle analysis by laser mass spectrometry, measuring particles of 150–500 nm) at high altitudes.  
398 This indicates that organics play an important, if not dominant role in high-altitude particle growth,  
399 even in some marine environments. However, whether organics also make a considerable  
400 contribution to NPF in these environments remains an open question.

## 401 **8. Sensitivity to isoprene emissions**

402 McFiggans et al. (47) suggested that isoprene suppresses SOA formed from monoterpenes  
403 through two mechanisms, i.e., OH scavenging and product scavenging. The OH scavenging is  
404 inherently considered in the WRF-Chem model while the product scavenging is not. To examine  
405 the OH scavenging effect, we conduct a sensitivity run with isoprene emissions in the modeling  
406 domain turned off (“no isoprene” case). Compared with the “no isoprene” case, the inclusion of

407 isoprene in the base case reduces average surface OH concentrations over relatively clean areas  
408 (red dashed rectangle in Fig. 1, which is the focus area of this study) by 71–72% in both the wet-  
409 season and dry-season periods. As a result, the SOA concentrations formed from monoterpenes  
410 decrease by 15–16% in both simulation periods, consistent with the OH scavenging effect  
411 proposed by McFiggans et al. (47). Note that the monoterpene SOA only decreases slightly when  
412 OH decreases dramatically; this is also consistent with the simulation results by McFiggans et al.  
413 (47) using the EMEP MSC-W model and is explained by the fact that the decrease in SOA from  
414 the monoterpene + OH reaction is largely counteracted by the increase in SOA from the  
415 monoterpene + O<sub>3</sub> reaction (see Fig. 5 of McFiggans et al. (47)). Our current model does not  
416 distinguish monoterpene + OH SOA from monoterpene + O<sub>3</sub> SOA, which prevents us from  
417 analyzing the changes in these two components separately.

418 The current WRF-Chem does not consider the product scavenging effect, the inclusion of  
419 which is expected to further reduce simulated monoterpene SOA to some extent. The product  
420 scavenging should also suppress the NPF triggered by monoterpene oxidation products near the  
421 surface (48-50), because isoprene reduces the yield of highly-oxygenated dimers with about 20  
422 carbon atoms that drive NPF, while increasing the production of dimers with about 15 carbon  
423 atoms (isoprene-monoterpene cross reaction products) (50). However, the impact on NPF in the  
424 upper troposphere may be more complicated, because dimers about 15 carbon atoms may also  
425 nucleate at low temperature due to reduced volatilities. Further studies are needed to systematically  
426 investigate the impact of isoprene on SOA and NPF, especially in the upper troposphere.

427

## 428 **References**

- 429 1. Schervish M, Donahue NM (2020) Peroxy radical chemistry and the volatility basis set.  
430 *Atmos. Chem. Phys.* 20(2):1183-1199.

- 431 2. Donahue NM, *et al.* (2012) Aging of biogenic secondary organic aerosol via gas-phase OH  
432 radical reactions. *P. Natl. Acad. Sci. USA*. 109(34):13503-13508.
- 433 3. Kirkby J, *et al.* (2016) Ion-induced nucleation of pure biogenic particles. *Nature*  
434 533(7604):521-526.
- 435 4. Ehn M, *et al.* (2014) A large source of low-volatility secondary organic aerosol. *Nature*  
436 506(7489):476-479.
- 437 5. Jokinen T, *et al.* (2015) Production of extremely low volatile organic compounds from  
438 biogenic emissions: Measured yields and atmospheric implications. *P. Natl. Acad. Sci.*  
439 *USA*. 112(23):7123-7128.
- 440 6. Sarnela N, *et al.* (2018) Measurement-model comparison of stabilized Criegee intermediate  
441 and highly oxygenated molecule production in the CLOUD chamber. *Atmos. Chem. Phys.*  
442 18(4):2363-2380.
- 443 7. Berndt T, *et al.* (2016) Hydroxyl radical-induced formation of highly oxidized organic  
444 compounds. *Nat. Commun.* 7:13677.
- 445 8. Bela MM, *et al.* (2015) Ozone production and transport over the Amazon Basin during the  
446 dry-to-wet and wet-to-dry transition seasons. *Atmos. Chem. Phys.* 15(2):757-782.
- 447 9. Andreae MO, *et al.* (2015) The Amazon Tall Tower Observatory (ATTO): overview of  
448 pilot measurements on ecosystem ecology, meteorology, trace gases, and aerosols. *Atmos.*  
449 *Chem. Phys.* 15(18):10723-10776.
- 450 10. Shrivastava M, *et al.* (2019) Urban pollution greatly enhances formation of natural aerosols  
451 over the Amazon rainforest. *Nat. Commun.* 10:1046.
- 452 11. Liu Y, *et al.* (2016) Isoprene photochemistry over the Amazon rainforest. *P. Natl. Acad.*  
453 *Sci. USA*. 113(22):6125-6130.
- 454 12. Yanez-Serrano AM, *et al.* (2015) Diel and seasonal changes of biogenic volatile organic  
455 compounds within and above an Amazonian rainforest. *Atmos. Chem. Phys.* 15(6):3359-  
456 3378.
- 457 13. Jardine K, *et al.* (2011) Within-canopy sesquiterpene ozonolysis in Amazonia. *J. Geophys.*  
458 *Res-Atmos.* 116:D19301.
- 459 14. Shilling JE, *et al.* (2018) Aircraft observations of the chemical composition and aging of  
460 aerosol in the Manaus urban plume during GoAmazon 2014/5. *Atmos. Chem. Phys.*  
461 18(14):10773-10797.
- 462 15. Bianchi F, *et al.* (2019) Highly oxygenated organic molecules (HOM) from gas-phase  
463 autoxidation involving peroxy radicals: a key contributor to atmospheric aerosol. *Chem.*  
464 *Rev.* 119(6):3472-3509.
- 465 16. Shilling JE, *et al.* (2008) Particle mass yield in secondary organic aerosol formed by the  
466 dark ozonolysis of alpha-pinene. *Atmos. Chem. Phys.* 8(7):2073-2088.
- 467 17. Presto AA, Donahue NM (2006) Investigation of alpha-pinene plus ozone secondary  
468 organic aerosol formation at low total aerosol mass. *Environ. Sci. Technol.* 40(11):3536-  
469 3543.
- 470 18. Ng NL, *et al.* (2007) Effect of NO<sub>x</sub> level on secondary organic aerosol (SOA) formation  
471 from the photooxidation of terpenes. *Atmos. Chem. Phys.* 7(19):5159-5174.
- 472 19. Andreae MO, *et al.* (2018) Aerosol characteristics and particle production in the upper  
473 troposphere over the Amazon Basin. *Atmos. Chem. Phys.* 18(2):921-961.
- 474 20. Shrivastava M, *et al.* (2011) Modeling organic aerosols in a megacity: comparison of  
475 simple and complex representations of the volatility basis set approach. *Atmos. Chem.*  
476 *Phys.* 11(13):6639-6662.

- 477 21. Stolzenburg D, *et al.* (2018) Rapid growth of organic aerosol nanoparticles over a wide  
478 tropospheric temperature range. *P. Natl. Acad. Sci. USA*. 115(37):9122-9127.
- 479 22. Carter WPL (2000) Documentation of the SAPRC-99 chemical mechanism for VOC  
480 reactivity assessment, Final report to California Air Resources Board Contract 92-329 and  
481 Contract 95-308. (University of California Riverside).
- 482 23. Zaveri RA, Easter RC, Fast JD, Peters LK (2008) Model for simulating aerosol interactions  
483 and chemistry (MOSAIC). *J. Geophys. Res-Atmos*. 113(D13):D13204.
- 484 24. Fahey KM, Pandis SN (2001) Optimizing model performance: variable size resolution in  
485 cloud chemistry modeling. *Atmos. Environ*. 35(26):4471-4478.
- 486 25. Hu ZY, *et al.* (2016) Trans-Pacific transport and evolution of aerosols: evaluation of quasi-  
487 global WRF-Chem simulation with multiple observations. *Geosci. Model. Dev*. 9(5):1725-  
488 1746.
- 489 26. Zhao C, *et al.* (2013) Uncertainty in modeling dust mass balance and radiative forcing from  
490 size parameterization. *Atmos. Chem. Phys*. 13(21):10733-10753.
- 491 27. Lawrence DM, *et al.* (2011) Parameterization Improvements and Functional and Structural  
492 Advances in Version 4 of the Community Land Model. *J. Adv. Model. Earth Syst*.  
493 3:M03001.
- 494 28. Hong SY, Yign N, Dudhia J (2006) A new vertical diffusion package with an explicit  
495 treatment of entrainment processes. *Mon. Weather. Rev*. 134(9):2318-2341.
- 496 29. Grell GA, Freitas SR (2014) A scale and aerosol aware stochastic convective  
497 parameterization for weather and air quality modeling. *Atmos. Chem. Phys*. 14(10):5233-  
498 5250.
- 499 30. Morrison H, Thompson G, Tatarskii V (2009) Impact of cloud microphysics on the  
500 development of trailing stratiform precipitation in a simulated squall line: comparison of  
501 one- and two-moment schemes. *Mon. Weather. Rev*. 137(3):991-1007.
- 502 31. Clough SA, *et al.* (2005) Atmospheric radiative transfer modeling: a summary of the AER  
503 codes. *J. Quant. Spectrosc. Radiat. Transf*. 91(2):233-244.
- 504 32. Abdul-Razzak H, Ghan SJ (2002) A parameterization of aerosol activation. 3. Sectional  
505 representation. *J. Geophys. Res*. 107(D3):AAC1-1-6.
- 506 33. Easter RC, *et al.* (2004) MIRAGE: Model description and evaluation of aerosols and trace  
507 gases. *J. Geophys. Res-Atmos*. 109(D20):D20210.
- 508 34. Grell GA, Devenyi D (2002) A generalized approach to parameterizing convection  
509 combining ensemble and data assimilation techniques. *Geophys. Res. Lett*. 29(14):1693.
- 510 35. Guenther AB, *et al.* (2012) The Model of Emissions of Gases and Aerosols from Nature  
511 version 2.1 (MEGAN2.1): an extended and updated framework for modeling biogenic  
512 emissions. *Geosci. Model. Dev*. 5(6):1471-1492.
- 513 36. Zhao C, *et al.* (2016) Sensitivity of biogenic volatile organic compounds to land surface  
514 parameterizations and vegetation distributions in California. *Geosci. Model. Dev*.  
515 9(5):1959-1976.
- 516 37. Wiedinmyer C, *et al.* (2011) The Fire INventory from NCAR (FINN): a high resolution  
517 global model to estimate the emissions from open burning. *Geosci. Model. Dev*. 4(3):625-  
518 641.
- 519 38. Lupascu A, *et al.* (2015) Modeling particle nucleation and growth over northern California  
520 during the 2010 CARES campaign. *Atmos. Chem. Phys*. 15(21):12283-12313.

- 521 39. Martin ST, *et al.* (2017) The Green Ocean Amazon experiment (GoAmazon2014/5)  
522 observes pollution affecting gases, aerosols, clouds, and rainfall over the rain forest. *B. Am.*  
523 *Meteorol. Soc.* 98(5):981-997.
- 524 40. Wang J, *et al.* (2016) Amazon boundary layer aerosol concentration sustained by vertical  
525 transport during rainfall. *Nature* 539(7629):416-419.
- 526 41. Wendisch M, *et al.* (2016) ACRIDICON-CHUVA campaign: studying tropical deep  
527 convective clouds and precipitation over Amazonia using the new German research aircraft  
528 HALO. *B. Am. Meteorol. Soc.* 97(10):1885-1908.
- 529 42. Praske E, *et al.* (2018) Atmospheric autoxidation is increasingly important in urban and  
530 suburban North America. *P. Natl. Acad. Sci. USA.* 115(1):64-69.
- 531 43. Dunne EM, *et al.* (2016) Global atmospheric particle formation from CERN CLOUD  
532 measurements. *Science* 354(6316):1119-1124.
- 533 44. Williamson CJ, *et al.* (2019) A large source of cloud condensation nuclei from new particle  
534 formation in the tropics. *Nature* 574(7778):399-403.
- 535 45. Clarke AD, *et al.* (1999) Nucleation in the equatorial free troposphere: Favorable  
536 environments during PEM-Tropics. *J. Geophys. Res-Atmos.* 104(D5):5735-5744.
- 537 46. Clarke AD, Kapustin VN (2002) A pacific aerosol survey. Part I: A decade of data on  
538 particle production, transport, evolution, and mixing in the troposphere. *J. Atmos. Sci.*  
539 59(3):363-382.
- 540 47. McFiggans G, *et al.* (2019) Secondary organic aerosol reduced by mixture of atmospheric  
541 vapours. *Nature* 565(7741):587-593.
- 542 48. Kiendler-Scharr A, *et al.* (2009) New particle formation in forests inhibited by isoprene  
543 emissions. *Nature* 461(7262):381-384.
- 544 49. Lee SH, *et al.* (2016) Isoprene suppression of new particle formation: Potential  
545 mechanisms and implications. *J. Geophys. Res-Atmos.* 121(24):14621-14635.
- 546 50. Heinritzi M, Dada L, Simon M, Stolzenburg D, Wagner AC (2020) Molecular  
547 understanding of the suppression of new-particle formation by isoprene. *Atmos. Chem.*  
548 *Phys. Discuss.*:10.5194/acp-2020-5151.

550 **Figures and Tables**

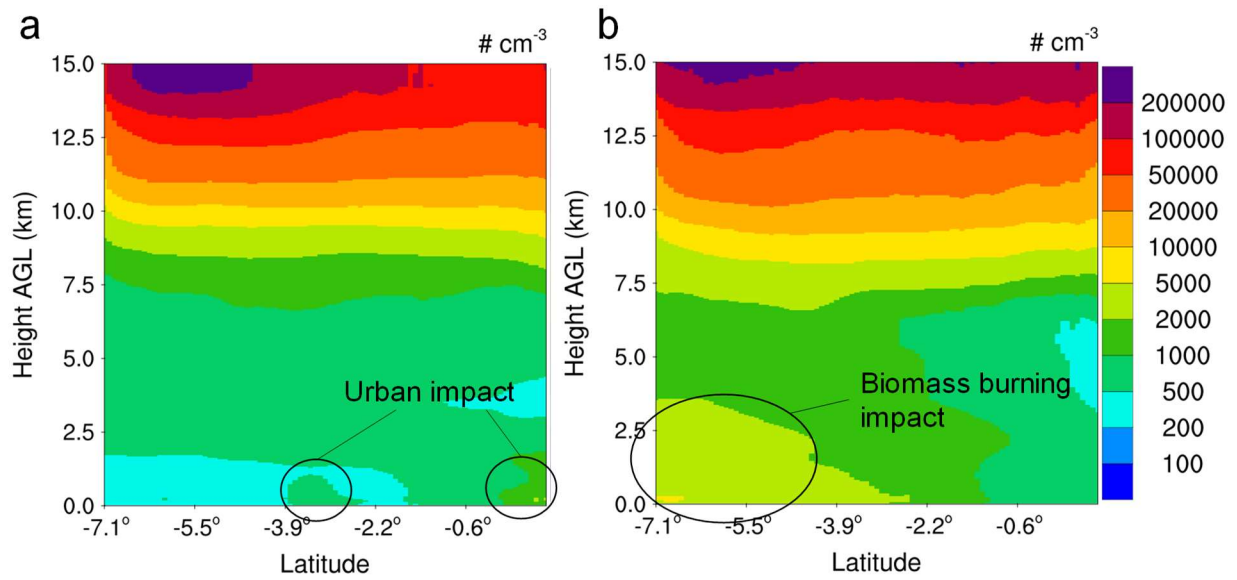

551  
552 **Figure S1.** Zonal mean number concentration of aerosols larger than 3 nm diameter in the modeling domain  
553 averaged during the (a) wet season and (b) dry season periods, simulated by the “inorg+org\_2D-VBS”  
554 scenario. The aerosol number concentrations are normalized to standard temperature and pressure (STP;  
555 273.15 K and 101.325 kPa). The results show that the high aerosol concentration in the upper troposphere  
556 is ubiquitous, regardless of whether it is close to the urban or biomass-burning areas.

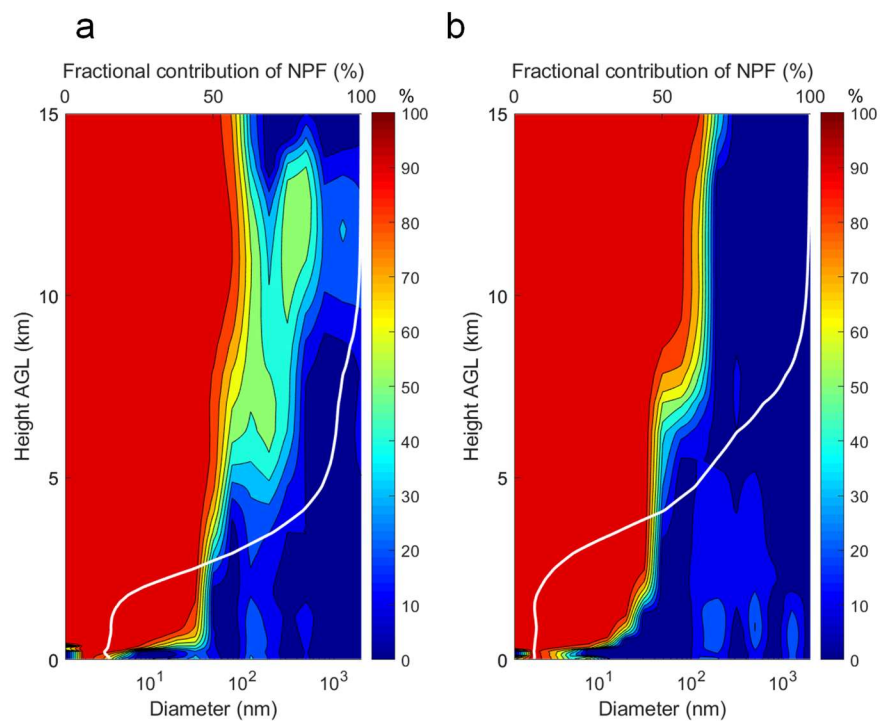

557  
 558 **Figure S2.** Averaged fractional contribution to aerosol number concentration of NPF occurring within the  
 559 modeling domain as a function of height during the (a) wet season and (b) dry season periods. The white  
 560 line represents the fractional contribution to total aerosol number concentration and the contours represent  
 561 the contributions to size-resolved aerosol number concentrations. The contribution is quantified using the  
 562 difference between the “inorg+org\_2D-VBS” and “nonuc” scenarios. Note that this figure does not account  
 563 for the contribution of NPF occurring outside of the modeling domain, which may contribute a large fraction  
 564 of the particle number at low altitudes.



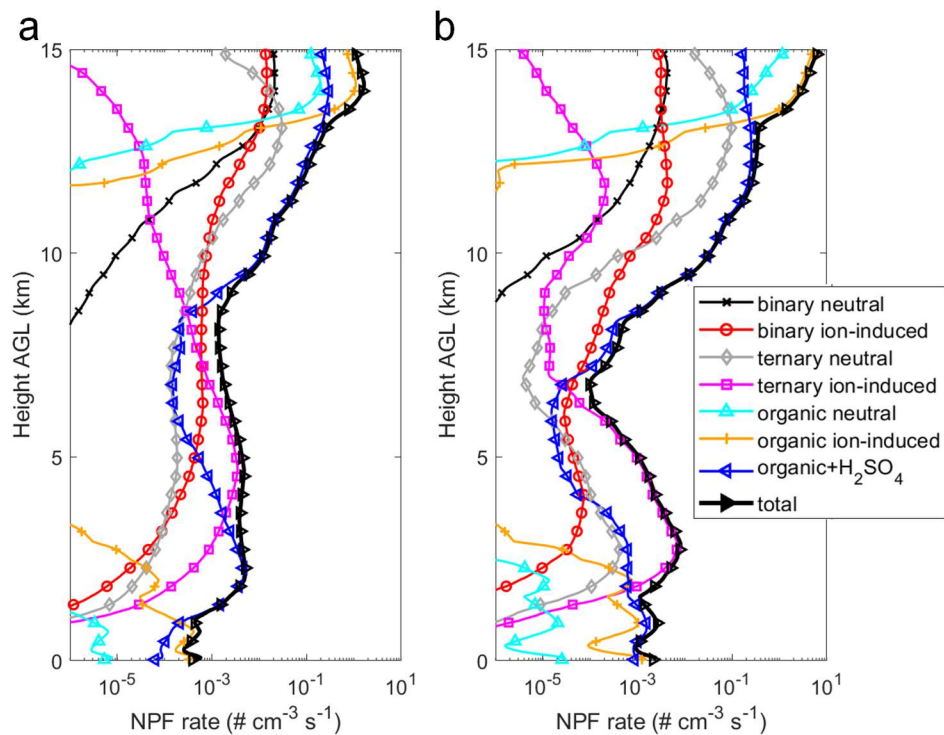

565

566 **Figure S3.** NPF rates from seven pathways and the total NPF rate at a diameter of 1.7 nm ( $J_{1.7}$ ) averaged  
 567 over relatively clean areas (red dashed rectangle in Fig. 1) during the (a) wet season and (b) dry season  
 568 periods, simulated by the “inorg+org\_2D-VBS” scenario.

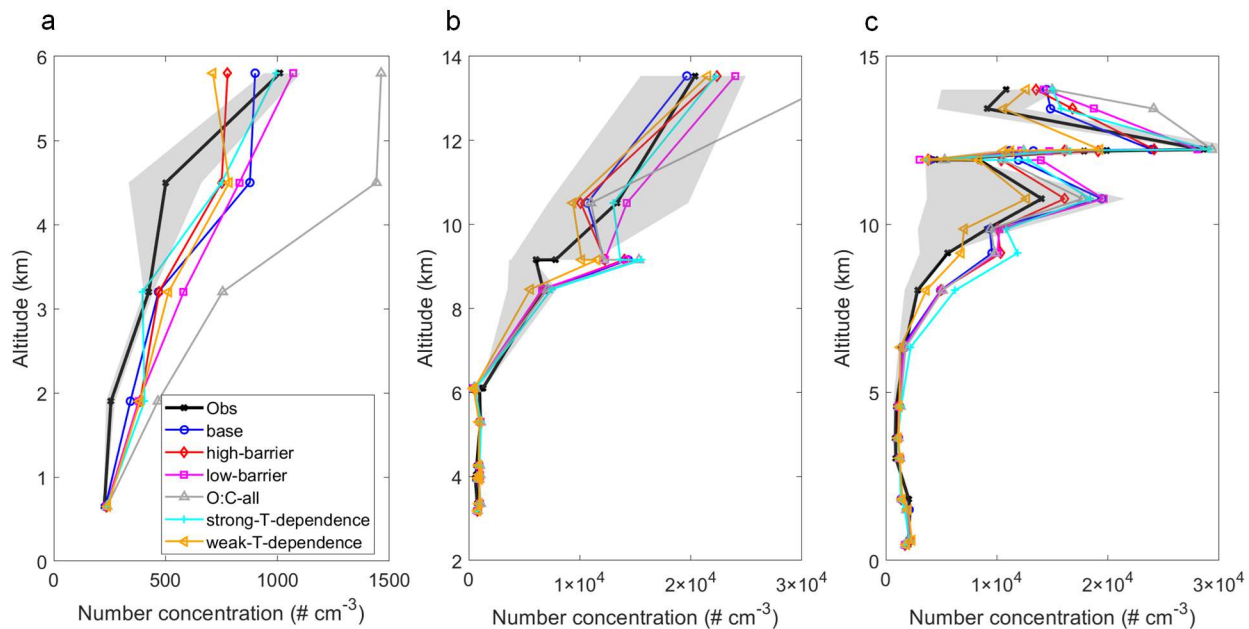

569  
 570 **Figure S4.** The same as Fig. 4 but for the base case (i.e., “inorg+org\_2D-VBS”) and different sensitivity  
 571 simulations. The lines are mean concentrations within each vertical bin while the shaded areas represent  
 572 the 25<sup>th</sup> to 75<sup>th</sup> percentiles of the observations. The definitions of the sensitivity scenarios are described in  
 573 *SI Appendix*, Section 5 and Table S1.

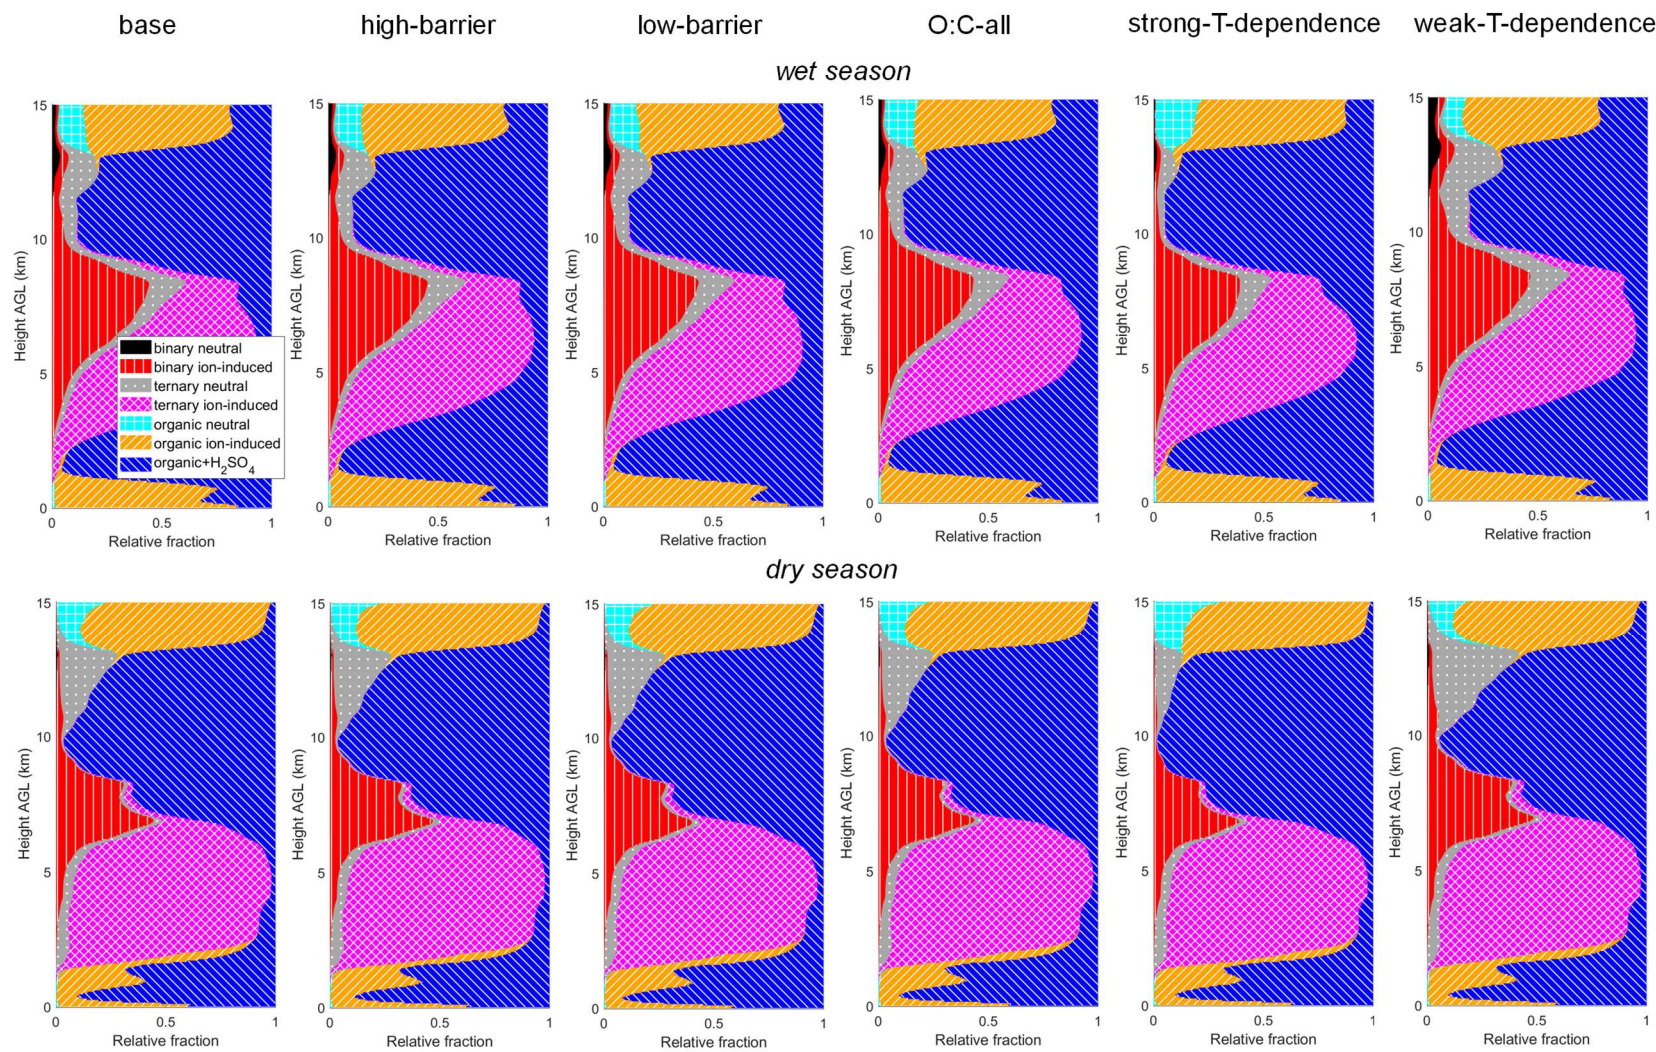

574

575 **Figure S5.** Relative contributions of seven different NPF mechanisms averaged over relatively clean areas (red dashed rectangle in Fig. 1) for the  
 576 base case (i.e., “inorg+org\_2D-VBS”) and different sensitivity simulations. The definitions of the sensitivity scenarios are described in *SI Appendix*,  
 577 Section 5 and Table S1.

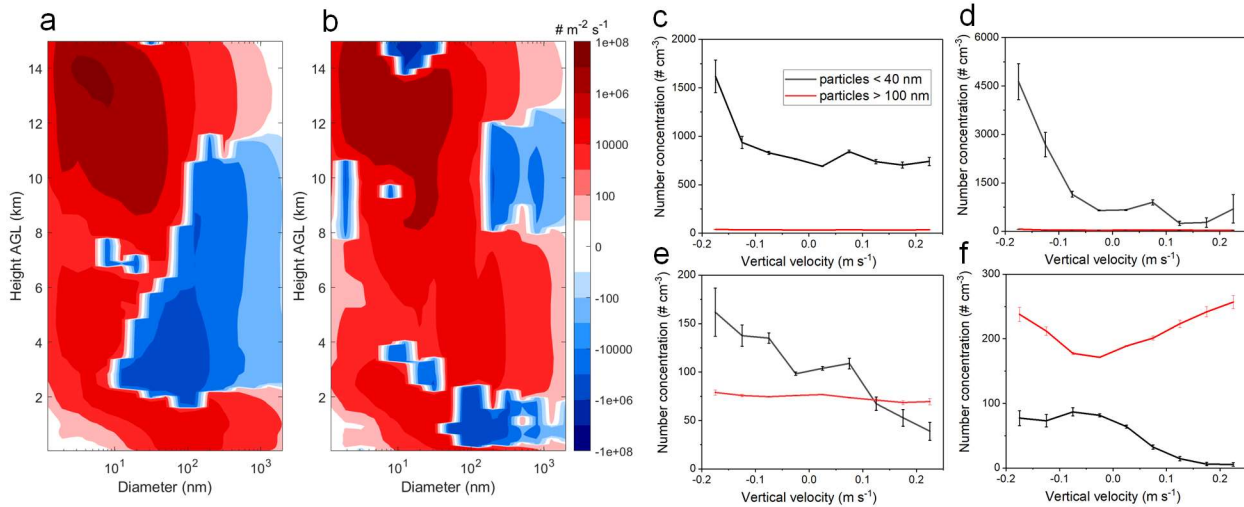

578  
 579 **Figure S6.** Vertical transport of aerosols and its contribution to aerosol number concentrations, simulated  
 580 by the “inorg+org\_2D-VBS” scenario. (a, b) Net vertical aerosol fluxes as a function of height, averaged  
 581 over relatively clean areas (red dashed rectangle in Fig. 1) during the (a) wet season and (b) dry season  
 582 periods. Positive and negative fluxes represent downward and upward transport, respectively. (c-f)  
 583 Variations in the number concentrations of small ( $D_p < 40$  nm) and large particles ( $D_p > 100$  nm) with  
 584 vertical velocity at (c, d) 380 hPa (7.8 km) and (e, f) 800 hPa (1.9 km) during the (c, e) wet season and  
 585 (d, f) dry season periods. Positive and negative vertical velocities represent ascending and descending motions,  
 586 respectively. The error bars are standard error of the mean ( $\sigma/\sqrt{N}$ ), where  $N$  is the sample number (i.e., the  
 587 number of grid points falling within each bin of vertical velocity) and  $\sigma$  is the standard deviation. The  
 588 aerosol number concentrations are normalized to STP.

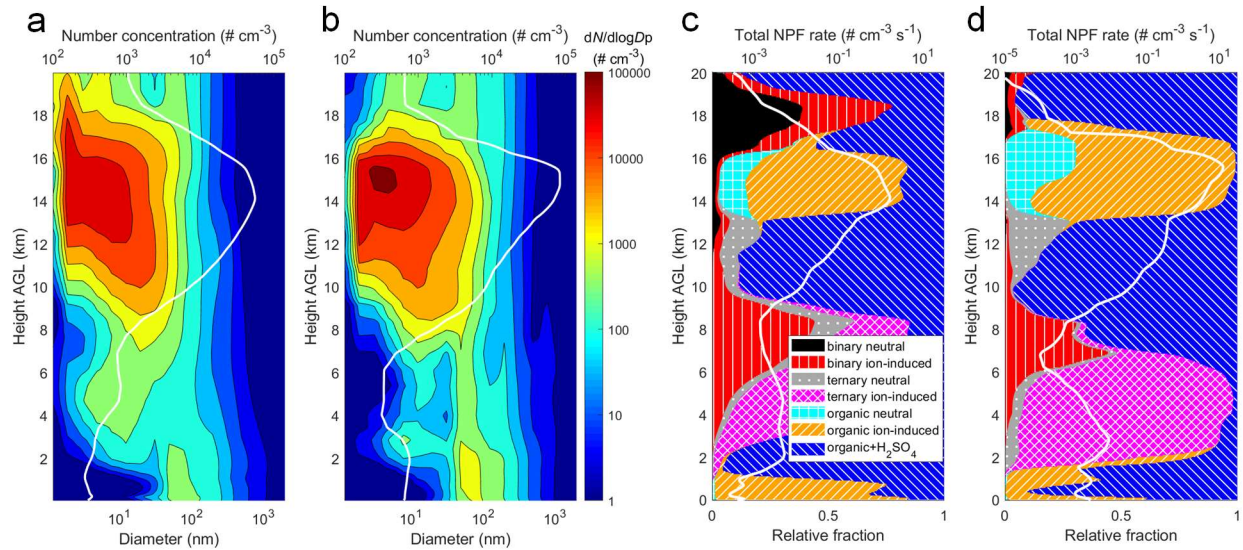

589

590 **Figure S7.** The same as Fig. 2 in the main text except that the height range is extended from 0–15 km to  
 591 0–20 km. The aerosol number concentration, total NPF rate, and organic NPF rates decrease dramatically  
 592 with increasing height near the tropopause (16–18 km), mainly because the concentrations of organics  
 593 decrease substantially with height at these altitudes (see *SI Appendix*, Fig. S8).

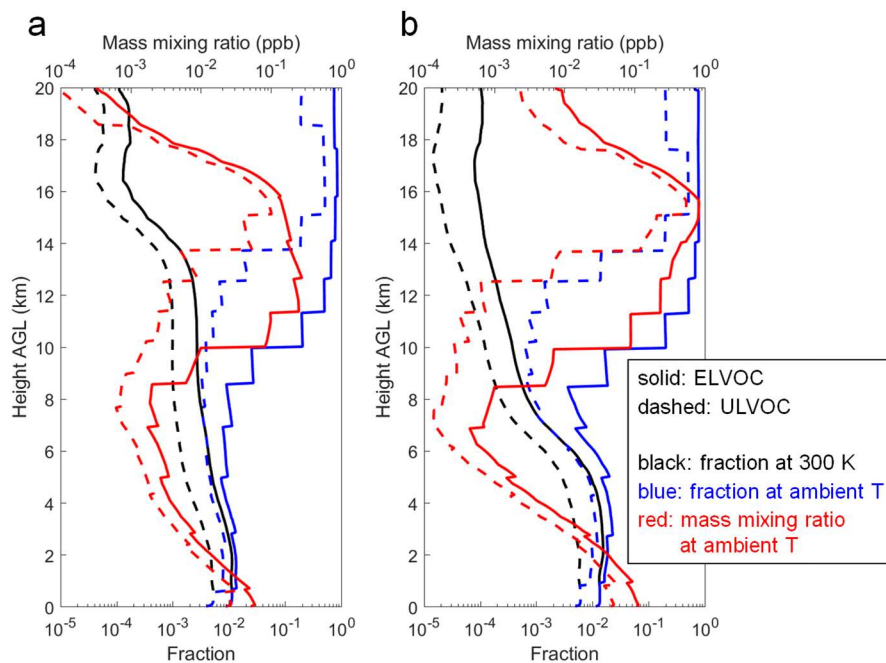

594  
 595 **Figure S8.** The same as Fig. 3 in the main text except that the height range is extended from 0–15 km to  
 596 0–20 km. The mixing ratios of ULVOC and ELVOC decrease dramatically with increasing height near the  
 597 tropopause (16–18 km), mainly because their precursors (monoterpenes) are difficult to be lifted to these  
 598 altitudes due to weakened vertical mixing near the tropopause.

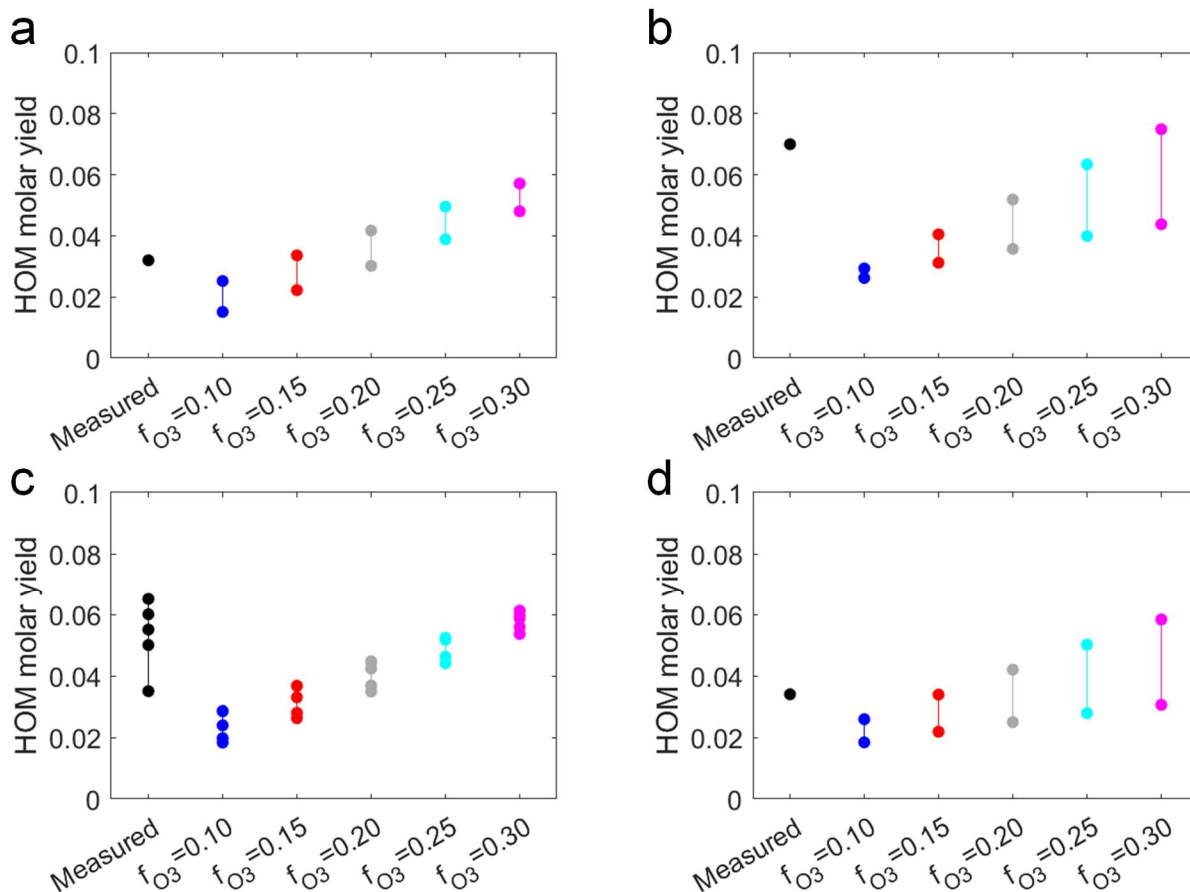

599

600 **Figure S9.** Comparison of 2D-VBS simulated HOM molar yields with laboratory experiments on  $\alpha$ -pinene  
 601 +  $O_3$ , using different fractions of first-generation peroxy radicals that can potentially autoxidize ( $f_{O_3}$ ).  
 602 Panels (a–d) show comparison results with measurements from Kirkby et al. (3), Ehn et al. (4), Sarnela et  
 603 al. (6), and Jokinen et al. (5), respectively. Each colored dot represents the measured HOM yield for an  
 604 experiment or the simulated HOM yield for a model run. In (a, b, d) we only show one dot for measurements  
 605 because the corresponding literature only reports the mean HOM yield for all experiments.

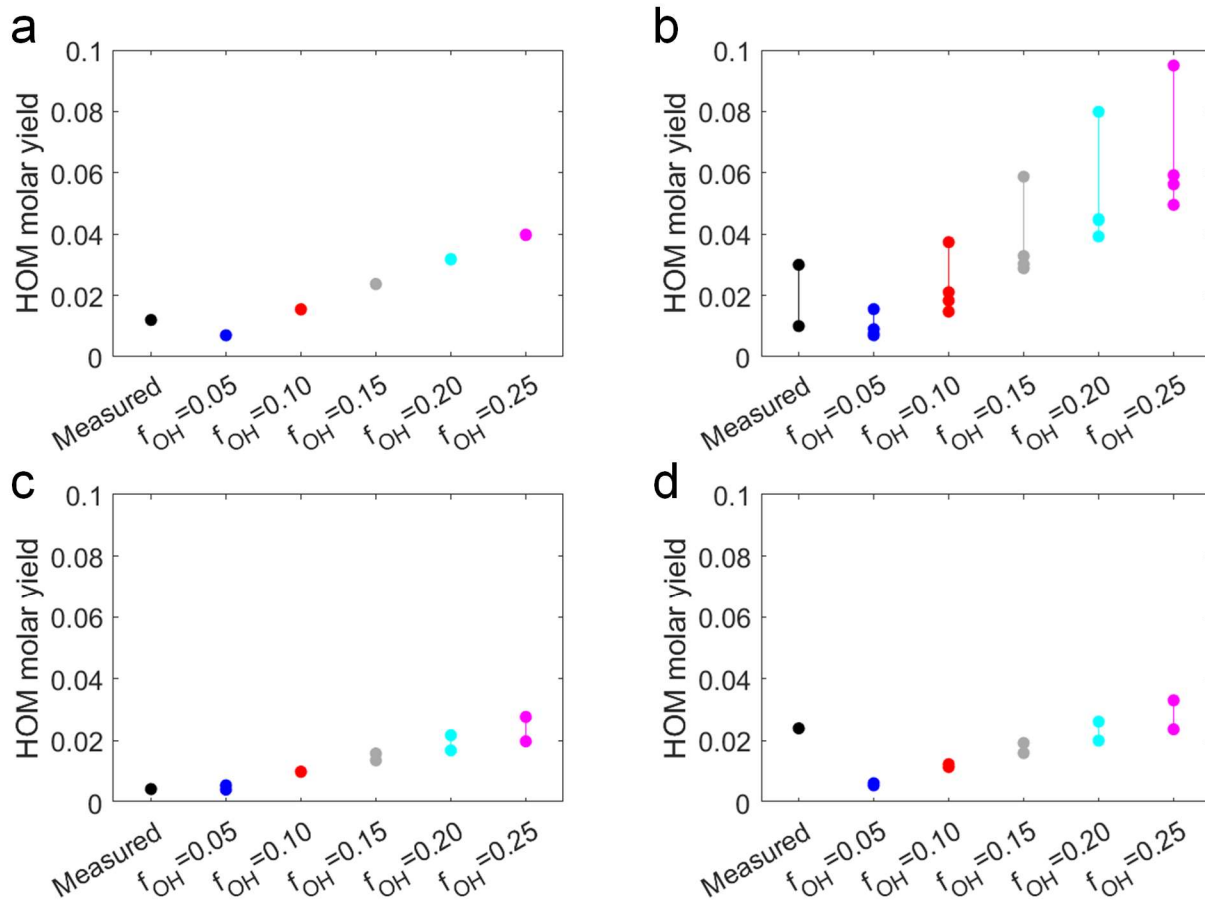

606

607 **Figure S10.** Comparison of 2D-VBS simulated HOM molar yields with laboratory experiments on  $\alpha$ -  
 608 pinene + OH, using different fractions of first-generation peroxy radicals that can potentially autoxidize  
 609 ( $f_{OH}$ ). Panels (a–d) show comparison results with measurements from Kirkby et al. (3), Ehn et al. (4),  
 610 Jokinen et al. (5), and Berndt et al. (7), respectively. The meaning of colored dots is the same as that of Fig.  
 611 S9.



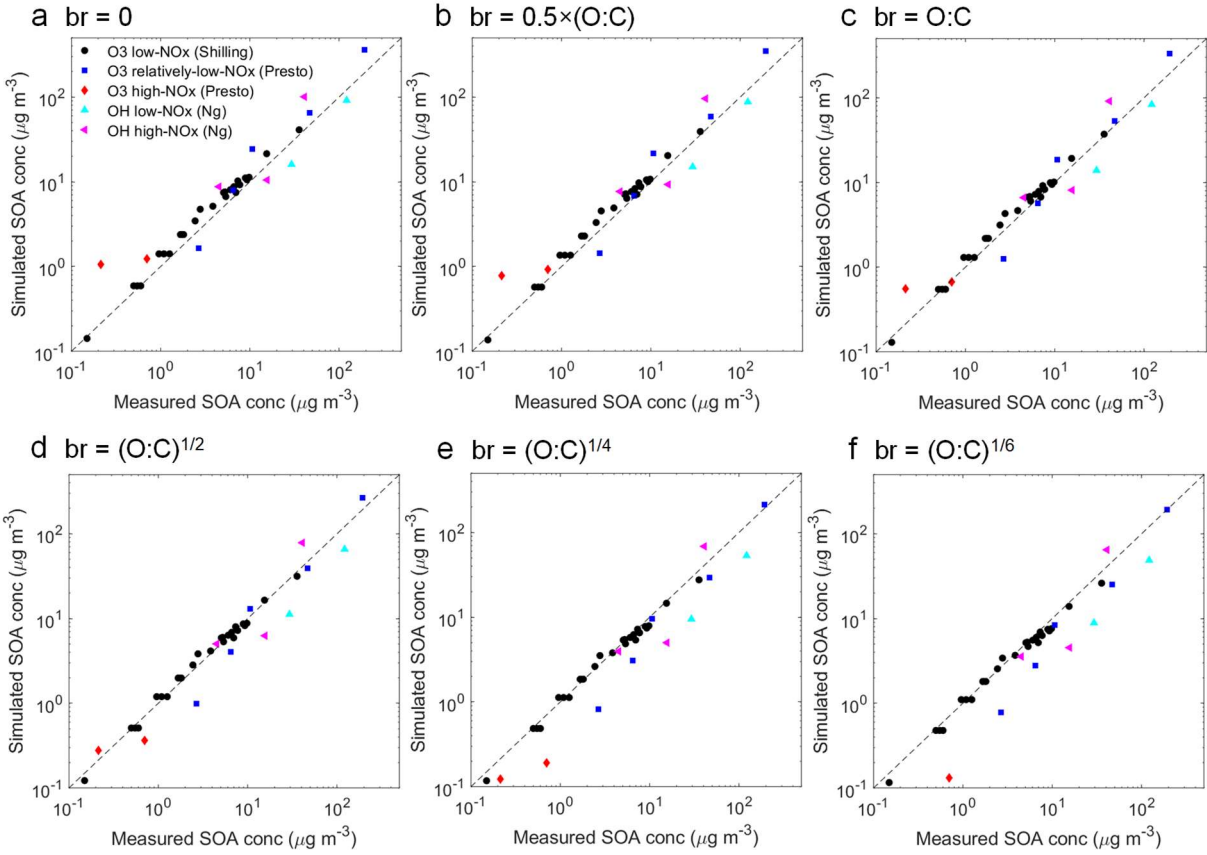

612

613

614

615

616

617

**Figure S11.** Model-measurement comparison of SOA concentrations for 2D-VBS simulations using different  $br$  vs. laboratory experiments involving reactions of  $\alpha$ -pinene with  $O_3$  and  $OH$ , under both high- $NO_x$  and low- $NO_x$  conditions. Panel (a–f) show comparison results with different parameterizations of  $br$ , where the  $br$  at a certain O:C gradually increases from (a) to (f). The experimental conditions are summarized in Table 1 of Shilling et al. (16), Table 1 of Presto et al. (17), and Table 2 of Ng et al. (18).

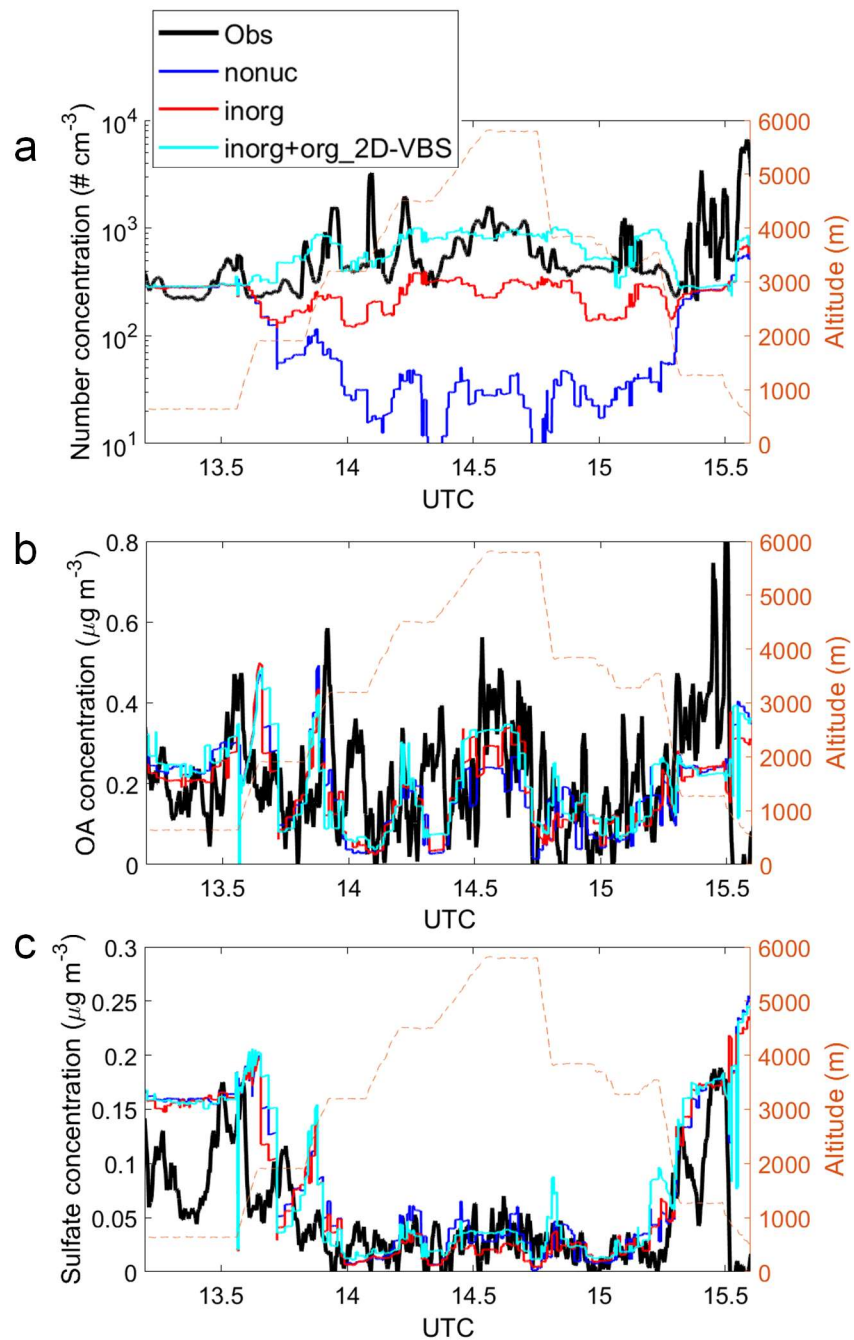

618

619 **Figure S12.** Comparison of simulated aerosol concentration with G-1 aircraft measurements on March 7.

620 (a) aerosol number concentration, (b) organic aerosol (OA) mass concentration, and (c) sulfate mass

621 concentration. The orange dashed line represents the aircraft altitude (right axis). The aerosol number and

622 mass concentrations are normalized to STP. The definitions of the model scenarios are provided in the main

623 text and in *SI Appendix*, Table S1. Details of the observational data are described in *SI Appendix*, Section 3.

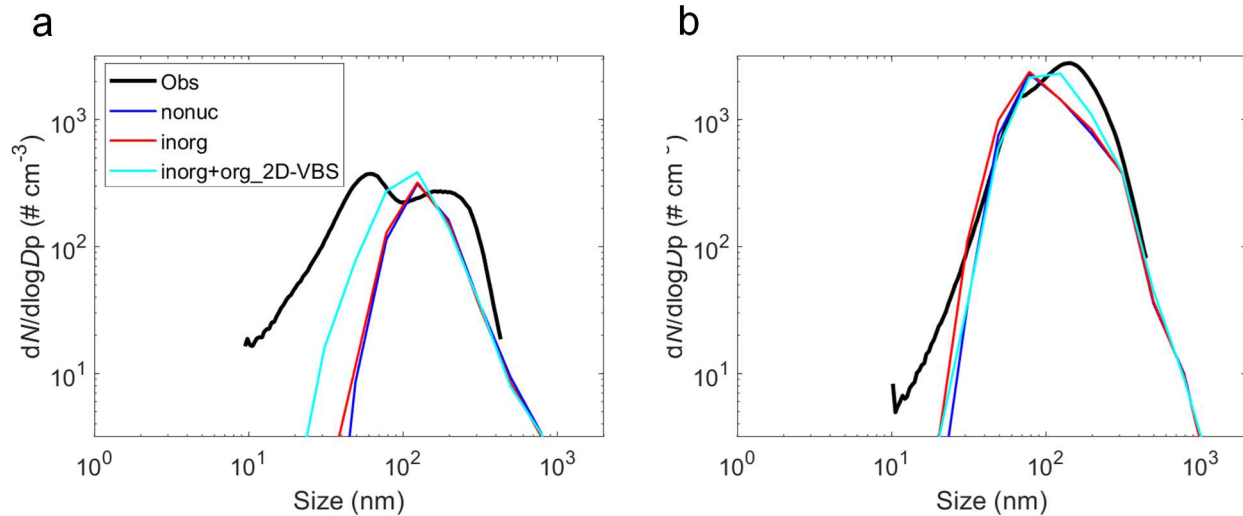

624  
 625 **Figure S13.** Comparison of simulated aerosol number size distribution with surface observation at the T0a  
 626 site during the (a) wet season and (b) dry season periods. The aerosol size distributions are normalized to  
 627 STP. The definitions of the model scenarios are provided in the main text and in *SI Appendix*, Table S1.  
 628 Details of the observational data are described in *SI Appendix*, Section 3.

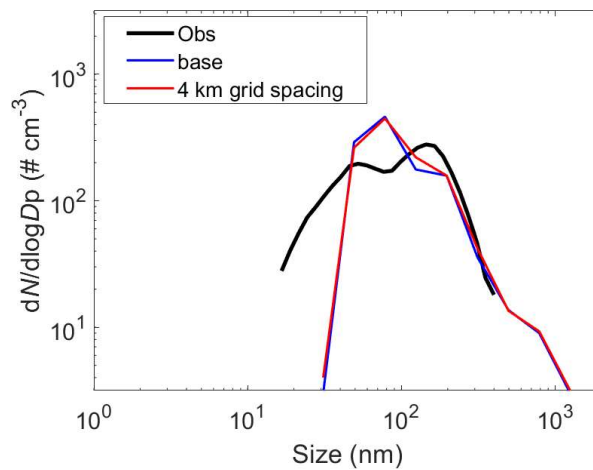

629  
 630 **Figure S14.** Comparison of aerosol number size distribution simulated by 4 km grid spacing with G-1  
 631 measurements at 650 m altitude on March 7. Details of the observational data are described in *SI Appendix*,  
 632 Section 3.

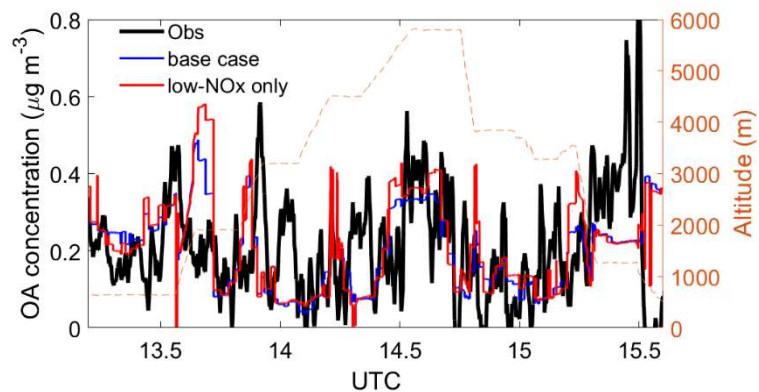

633  
 634 **Figure S15.** Comparison of simulated OA concentrations with G-1 aircraft measurements on March 7. The  
 635 “low-NO<sub>x</sub> only” case is the same as the base case except that the 2D-VBS parameters are determined only  
 636 based on evaluation against low-NO<sub>x</sub> experiments. The orange dashed line represents the aircraft altitude  
 637 (right axis). The OA concentrations are normalized to STP (273.15 K and 101.325 kPa). The definitions of  
 638 the model scenarios are provided in the text and in SI Appendix, Table S1.

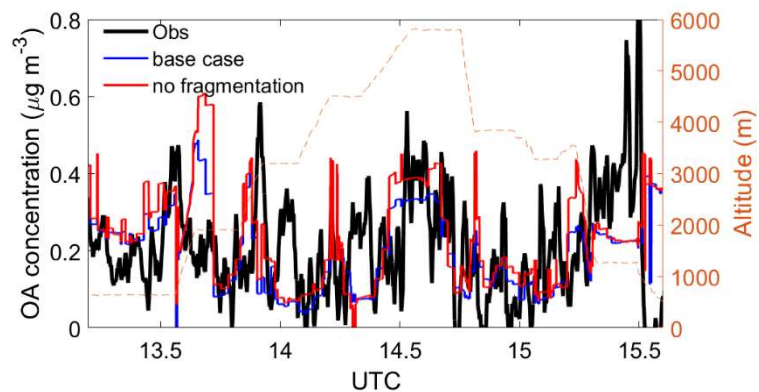

639  
 640 **Figure S16.** Comparison of simulated OA concentrations with G-1 aircraft measurements on March 7. The  
 641 “no fragmentation” case is the same as the base case except that fragmentation is not assumed to occur,  
 642 which is the default assumption of Schervish and Donahue (1). The orange dashed line represents the  
 643 aircraft altitude (right axis). The OA concentrations are normalized to STP. The definitions of the model  
 644 scenarios are provided in the text and in SI Appendix, Table S1.

645 **Table S1.** Summary of model scenarios developed in this study.

| <b>Scenario</b>              | <b>Description</b>                                                                                                                                                                                                                                                                                           |
|------------------------------|--------------------------------------------------------------------------------------------------------------------------------------------------------------------------------------------------------------------------------------------------------------------------------------------------------------|
| <i>Main scenarios</i>        |                                                                                                                                                                                                                                                                                                              |
| nonuc                        | A simulation without NPF.                                                                                                                                                                                                                                                                                    |
| inorg                        | A simulation with only inorganic NPF included.                                                                                                                                                                                                                                                               |
| inorg+org_simple             | A simulation with both inorganic and organic NPF included, and the organics that nucleate are assumed to be a fixed fraction of all monoterpene oxidation products.                                                                                                                                          |
| inorg+org_2D-VBS             | A simulation with both inorganic and organic NPF included, and the organics that nucleate are simulated using the radical 2D-VBS framework. This is considered as the best-case scenario and used in most analyses of the present study. It is also used as the “base case” for sensitivity scenarios below. |
| <i>Sensitivity scenarios</i> |                                                                                                                                                                                                                                                                                                              |
| high-barrier                 | Based on “inorg+org_2D-VBS”, this scenario fixes autoxidation rate at 298 K and increases the barrier height by 500 K in a Clausius-Clapeyron-like expression. This results in a stronger temperature dependence of autoxidation rate.                                                                       |
| low-barrier                  | Based on “inorg+org_2D-VBS”, this scenario fixes autoxidation rate at 298 K and decreases the barrier height by 500 K in a Clausius-Clapeyron-like expression. This results in a weaker temperature dependence of autoxidation rate.                                                                         |
| O:C-all                      | The same as “inorg+org_2D-VBS” except that ULVOC and ELVOC with all O:C values are assumed to drive pure-organic and organic+H <sub>2</sub> SO <sub>4</sub> NPF, respectively.                                                                                                                               |
| strong-T-dependence          | The same as “inorg+org_2D-VBS” except that a stronger temperature dependence function of NPF rate is used for organic-mediated NPF.                                                                                                                                                                          |
| weak-T-dependence            | The same as “inorg+org_2D-VBS” except that a weaker temperature dependence function of NPF rate is used for organic-mediated NPF.                                                                                                                                                                            |
| 4 km grid spacing            | The same as “inorg+org_2D-VBS” except that a 4 km grid spacing is used instead of 10 km.                                                                                                                                                                                                                     |
| low-NO <sub>x</sub> only     | The same as “inorg+org_2D-VBS” except that the 2D-VBS parameters are determined only based on evaluation against low-NO <sub>x</sub> experiments.                                                                                                                                                            |
| no fragmentation             | The same as “inorg+org_2D-VBS” except that fragmentation is not assumed to occur, which is the default assumption of Schervish and Donahue (1).                                                                                                                                                              |
| no isoprene                  | The same as “inorg+org_2D-VBS” except that isoprene emissions in the modeling domain are turned off.                                                                                                                                                                                                         |

646

647 **Table S2.** Summary of the reaction conditions for laboratory experiments that measure HOM yields from  
 648  $\alpha$ -pinene + O<sub>3</sub> reaction and the corresponding conditions for 2D-VBS simulations.

|                    |                                  | Experimental conditions | Conditions for 2D-VBS simulations <sup>a</sup> |       |       |       |       |
|--------------------|----------------------------------|-------------------------|------------------------------------------------|-------|-------|-------|-------|
|                    |                                  |                         | Run 1                                          | Run 2 | Run 3 | Run 4 | Run 5 |
| Kirkby et al. (3)  | $\alpha$ -pinene conc (ppb)      | 0.07–0.44 (~10 expts)   | 0.07                                           | 0.44  |       |       |       |
|                    | O <sub>3</sub> conc (ppb)        | 21–35 (~10 expts)       | 28                                             | 28    |       |       |       |
|                    | OH conc (mole cm <sup>-3</sup> ) | --                      | --                                             | --    |       |       |       |
|                    | T (K)                            | 278                     | 278                                            | 278   |       |       |       |
| Ehn et al. (4)     | $\alpha$ -pinene conc (ppb)      | 0–30 (> 50 expts)       | 0.5                                            | 15    |       |       |       |
|                    | O <sub>3</sub> conc (ppb)        | 12–86 (> 50 expts)      | 40                                             | 40    |       |       |       |
|                    | OH conc (mole cm <sup>-3</sup> ) | --                      | --                                             | --    |       |       |       |
|                    | T (K)                            | 289                     | 289                                            | 289   |       |       |       |
| Sarnela et al. (6) | $\alpha$ -pinene conc (ppb)      | 0.08–0.6 (5 expts)      | 0.08                                           | 0.08  | 0.6   | 0.17  | 0.53  |
|                    | O <sub>3</sub> conc (ppb)        | 22–24 (5 expts)         | 22                                             | 24    | 22    | 22    | 22    |
|                    | OH conc (mole cm <sup>-3</sup> ) | --                      | --                                             | --    | --    | --    | --    |
|                    | T (K)                            | 278                     | 278                                            | 278   | 278   | 278   | 278   |
| Jokinen et al. (5) | $\alpha$ -pinene conc (ppb)      | 0.085–160 (~10 expts)   | 0.2                                            | 50    |       |       |       |
|                    | O <sub>3</sub> conc (ppb)        | 21.9–23.3 (~10 expts)   | 23                                             | 23    |       |       |       |
|                    | OH conc (mole cm <sup>-3</sup> ) | --                      | --                                             | --    |       |       |       |
|                    | T (K)                            | 293                     | 293                                            | 293   |       |       |       |

649 <sup>a</sup> For all simulations,  $br = (O: C)^{1/2}$  and  $f_{OH} = 0.10$ ;  $f_{O_3}$  ranges from 0.10 to 0.30 (see Fig. S9).

650 **Table S3.** The same as Table S2 but for  $\alpha$ -pinene + OH reaction.

|                    |                                               | Experimental conditions                             | Conditions for 2D-VBS simulations <sup>a</sup> |                   |                   |                   |
|--------------------|-----------------------------------------------|-----------------------------------------------------|------------------------------------------------|-------------------|-------------------|-------------------|
|                    |                                               |                                                     | Run 1                                          | Run 2             | Run 3             | Run 4             |
| Kirkby et al. (3)  | $\alpha$ -pinene conc (ppb)                   | 0.84–0.91 (~12 expts)                               | 0.875                                          | 0.875             |                   |                   |
|                    | O <sub>3</sub> conc (ppb)                     | --                                                  | --                                             | --                |                   |                   |
|                    | OH conc (mole cm <sup>-3</sup> )              | (0.4–2)×10 <sup>5</sup> (~12 expts)                 | 4×10 <sup>4</sup>                              | 2×10 <sup>5</sup> |                   |                   |
|                    | T (K)                                         | 278                                                 | 278                                            | 278               |                   |                   |
| Ehn et al. (4)     | $\alpha$ -pinene conc (ppb)                   | 0.1–17 (> 30 expts)                                 | 0.5                                            | 0.5               | 10                | 10                |
|                    | O <sub>3</sub> conc (ppb)                     | --                                                  | --                                             | --                | --                | --                |
|                    | OH conc (mole cm <sup>-3</sup> )              | 8×10 <sup>6</sup> to 4×10 <sup>8</sup> (> 30 expts) | 1×10 <sup>7</sup>                              | 1×10 <sup>8</sup> | 1×10 <sup>7</sup> | 1×10 <sup>8</sup> |
|                    | T (K)                                         | 289                                                 | 289                                            | 289               | 289               | 289               |
| Jokinen et al. (5) | $\alpha$ -pinene conc (ppb)                   | 0.085–160 (~10 expts)                               | 0.2                                            | 50                |                   |                   |
|                    | O <sub>3</sub> conc (ppb) <sup>b</sup>        | 21.9–23.3 (~10 expts)                               | 23                                             | 23                |                   |                   |
|                    | OH conc (mole cm <sup>-3</sup> ) <sup>b</sup> | --                                                  | --                                             | --                |                   |                   |
|                    | T (K)                                         | 293                                                 | 293                                            | 293               |                   |                   |
| Berndt et al. (7)  | $\alpha$ -pinene conc (ppb)                   | 0.44–93 (> 40 expts)                                | 1.0                                            | 40                |                   |                   |
|                    | O <sub>3</sub> conc (ppb) <sup>b</sup>        | 23 (> 40 expts)                                     | 23                                             | 23                |                   |                   |
|                    | OH conc (mole cm <sup>-3</sup> ) <sup>b</sup> | --                                                  | --                                             | --                |                   |                   |
|                    | T (K)                                         | 295                                                 | 295                                            | 295               |                   |                   |

651 <sup>a</sup> For all simulations,  $br = (O: C)^{1/2}$  and  $f_{O_3} = 0.25$ ;  $f_{OH}$  ranges from 0.05 to 0.25 (see Fig. S10).

652 <sup>b</sup> For the experiments conducted by Jokinen et al. (5) and Berndt et al. (7), OH is generated by  $\alpha$ -pinene + O<sub>3</sub> reaction  
 653 rather than being directly added to the system.
